# Supplementary material for: Neurotensin receptor type 2 protects B-cell chronic lymphocytic leukemia cells from apoptosis
Source: PubMed Central journal article supplement (PMC5808079; doi:10.1038/onc.2017.365), 2017-10-23
Supplement: onc2017365x2.pdf [file onc2017365x2.pdf]

# Supplementary Figure 2

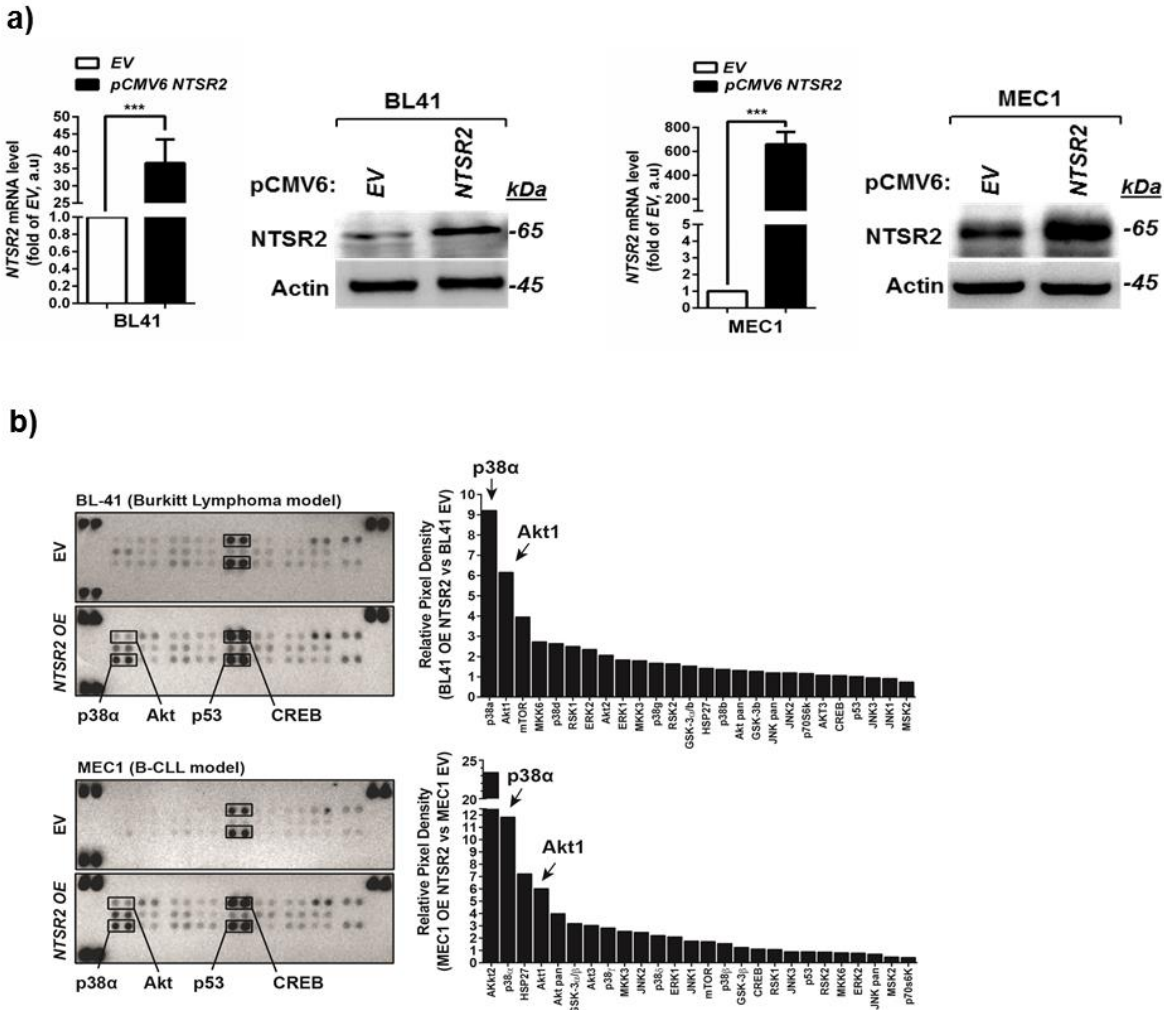

**Supplementary Figure 2. NTSR2 overexpression in BL-41 and MEC-1 cells**

**(a)** *NTSR2* mRNA and *NTSR2* protein expression levels in BL-41 or MEC-1 cells transfected with *NTSR2* expression vector (pCMV6 *NTSR2*) or empty vector (EV). Data are expressed as mean fold change ( $\pm$  s.e.m.) vs. empty vector. All experiments were repeated at least three times. **(b)** The signaling pathways activated by *NTSR2* overexpression were investigated using the Proteome Profiler Human Phospho-MAPK Array Kit (R&D Systems). In brief, transfected cells were grown in 24-well plates for 24 h and lysed, and approximately 300  $\mu$ g total protein was analyzed in each assay. Values are expressed as mean fold changes in *NTSR2* expression with respect to cells transfected with the empty vector.
