# Supplementary material for: Neurotensin receptor type 2 protects B-cell chronic lymphocytic leukemia cells from apoptosis
Source: PubMed Central journal article supplement (PMC5808079; doi:10.1038/onc.2017.365), 2017-10-23
Supplement: onc2017365x4.pdf [file onc2017365x4.pdf]

### Supplementary Figure 4

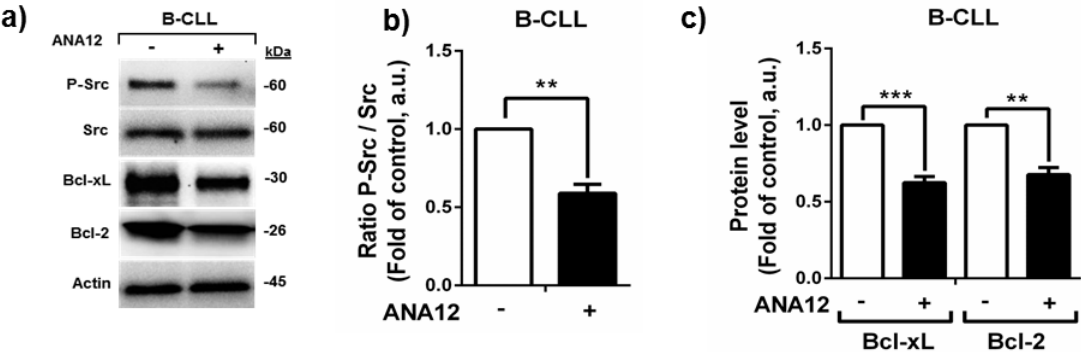

### Supplementary Figure 4. TrkB inhibition and prosurvival pathways

**(a)** Western blot analysis of P-Src, Bcl-xL, and Bcl-2 in B-CLL cell lysates following TrkB inhibition with ANA12 at 100  $\mu$ M for 24 h. **(b, c)** Expression levels of p-Src **(b)**, Bcl-xL, and Bcl-2 **(c)** represented as, respectively, the ratio of phosphorylated Src vs. pan-Src protein and the ratios of Bcl-xL and Bcl-2 to actin (B-CLL, n=3). Values are means  $\pm$  s.e.m. of three independent experiments, in arbitrary units (a.u.).
